# Supplementary material
Source: publisher figshare collection journal article supplement (https://acs.figshare.com/ndownloader/files/3625242)
Supplement: Supplementary file 1 [file 3625242]

# **Synthesis and Evaluation Terpolymers consist of Methacrylates with Maleic anhydride and Methacrylic Morpholine and Their Amine Compound as Pour Point Depressants in Diesel Fuels**

*Mingan Zhou, Yi He, Yanwei Chen, Yingpin Yang, HuaLin Lin<sup>\*</sup>, Sheng Han<sup>†</sup>*

*School of Chemical and Environmental Engineering, Shanghai Institute of Technology,*

*Shanghai, 201418, P.R. China*

## **Supporting Information**

### **Table of contents**

|                                                   |   |
|---------------------------------------------------|---|
| 1. NMR SPECTRA OF COMPOUNDS AND TERPOLYMERS ..... | 2 |
| 2. FTIR SPECTRA OF COMPOUNDS AND TERPOLYMERS..... | 7 |

---

<sup>\*</sup> Address co-correspondence to Dr. Hualin Lin, School of Chemical and Environmental Engineering, Shanghai Institute of Technology, Shanghai 201418, China. Tel: +86 021 6087 3560. E-mail address: [hlh65343@163.com](mailto:hlh65343@163.com);

<sup>†</sup> Address co-correspondence to Dr. Sheng Han, School of Chemical and Environmental Engineering, Shanghai Institute of Technology, Shanghai 201418, China. Tel: +86 18917950352; Email: [hansheng654321@sina.com](mailto:hansheng654321@sina.com);

# 1. NMR SPECTRA OF COMPOUNDS AND TERPOLYMERS

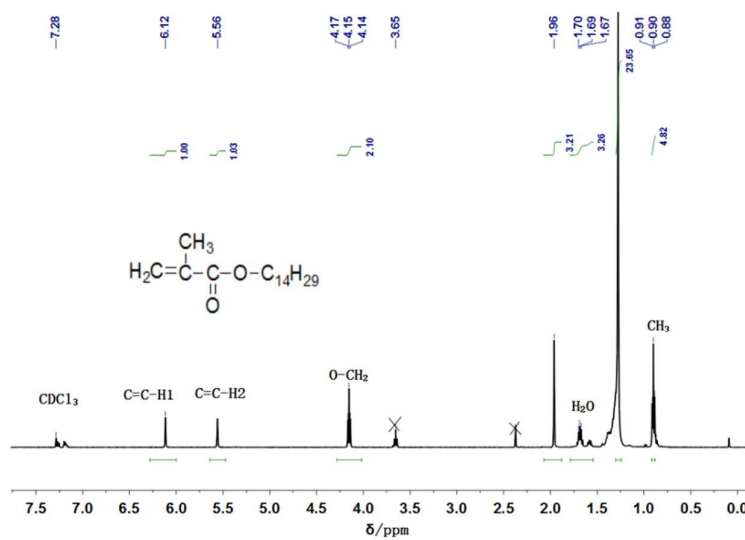

Figure S1. <sup>1</sup>H NMR spectrum (400 MHz) of **methyl acrylic fourteen ester** recorded in CDCl<sub>3</sub> at 298 K.

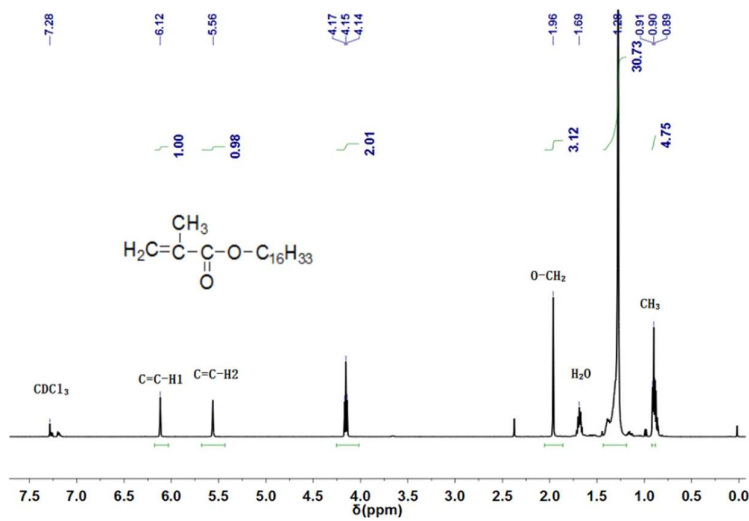

Figure S2. <sup>1</sup>H NMR spectrum (400 MHz) of **methyl acrylic fourteen ester** recorded in CDCl<sub>3</sub> at 298 K.

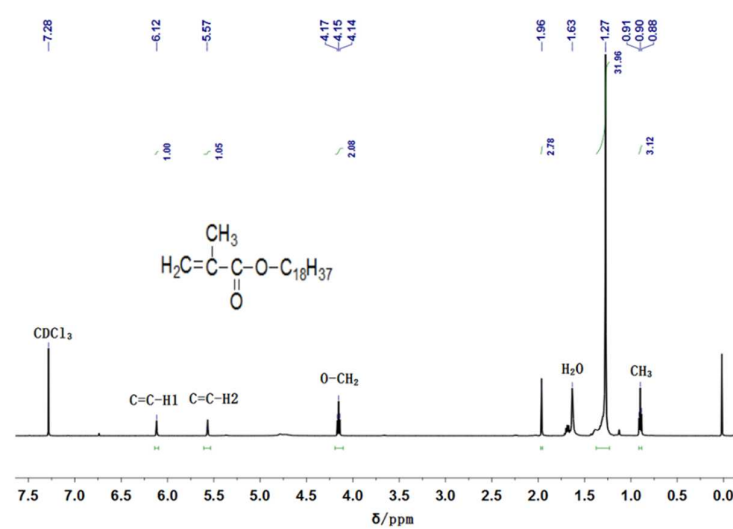

**Figure S3.** <sup>1</sup>H NMR spectrum (400 MHz) of **methyl acrylic eighteen ester** recorded in CDCl<sub>3</sub> at

298 K.

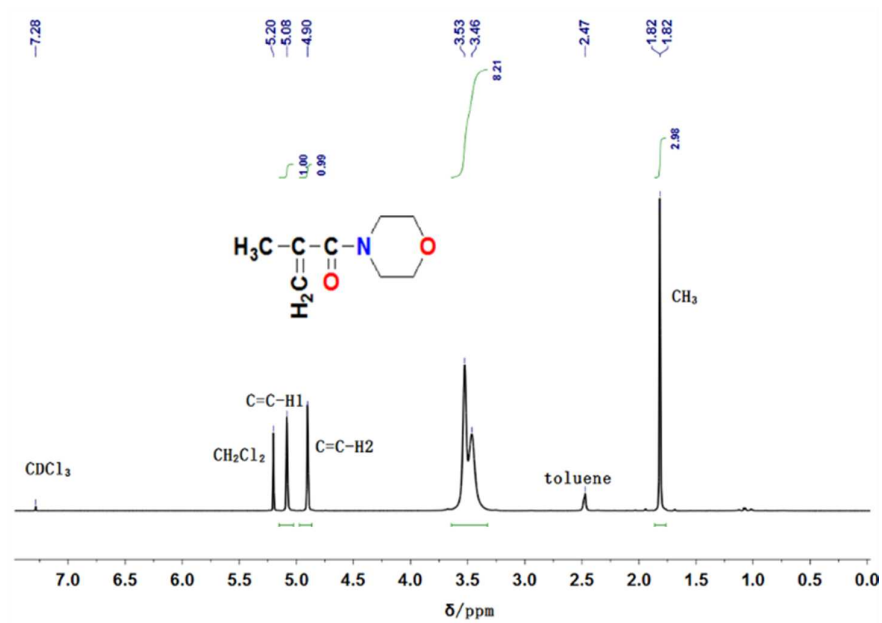

**Figure S4.** <sup>1</sup>H NMR spectrum (400 MHz) of **methyl acryloyl morpholine** recorded in CDCl<sub>3</sub> at

298 K.

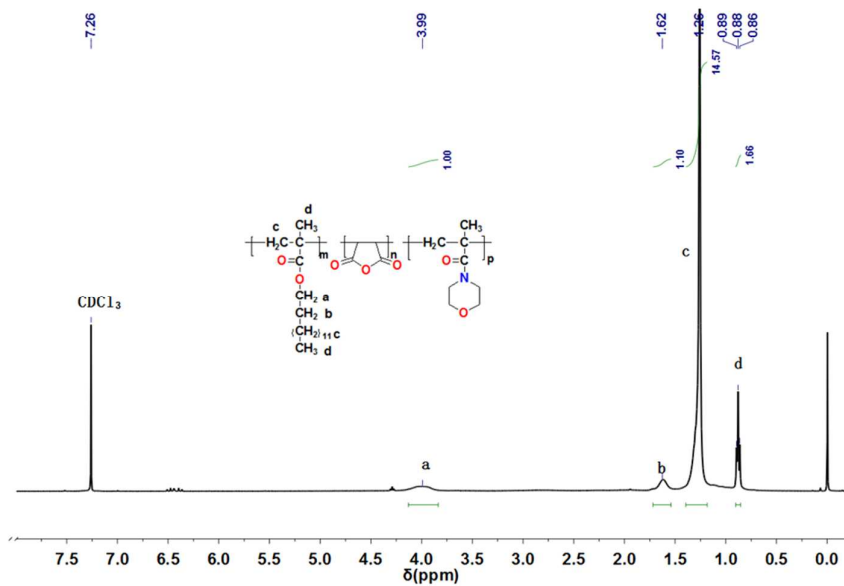

**Figure S5.**  $^1\text{H}$  NMR spectrum (400 MHz) of **C14MC-MA-MCNR<sub>2</sub>** recorded in  $\text{CDCl}_3$  at 298 K.

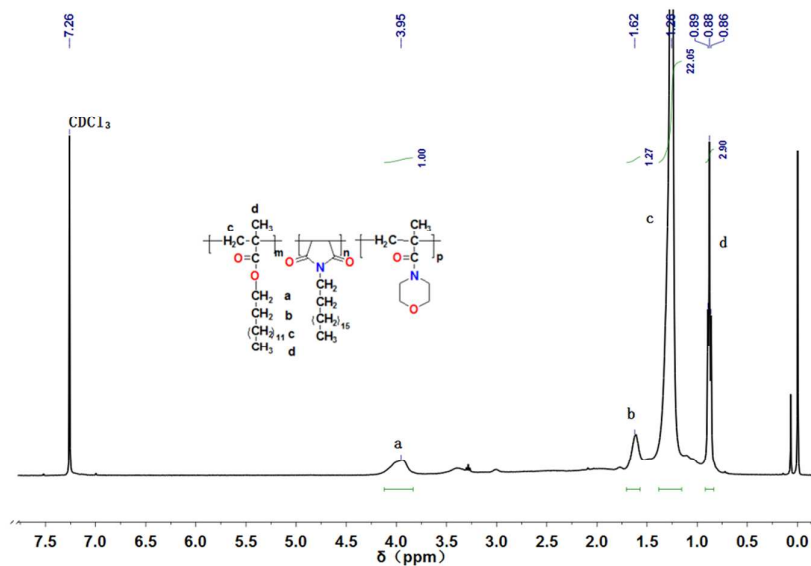

**Figure S6.**  $^1\text{H}$  NMR spectrum (400 MHz) of **C14MC-MA-MCNR<sub>2</sub>-A** recorded in  $\text{CDCl}_3$  at 298

K

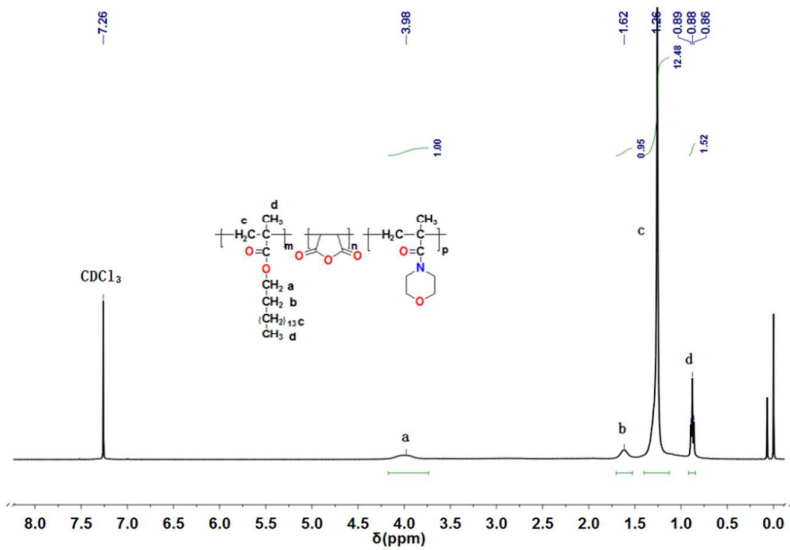

**Figure S7.** <sup>1</sup>H NMR spectrum (400 MHz) of **C16MC-MA-MCNR<sub>2</sub>** recorded in CDCl<sub>3</sub> at 298 K

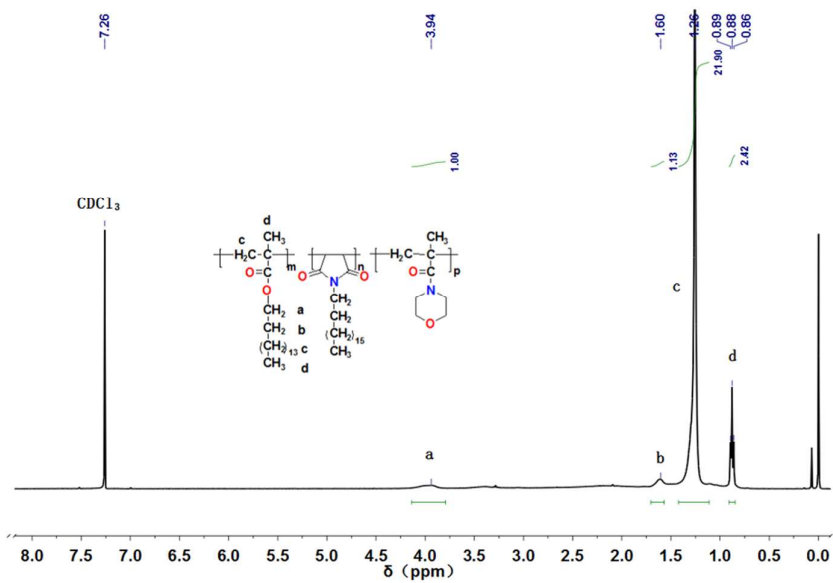

**Figure S8.** <sup>1</sup>H NMR spectrum (400 MHz) of **C16MC-MA-MCNR<sub>2</sub>-A** recorded in CDCl<sub>3</sub> at 298

K

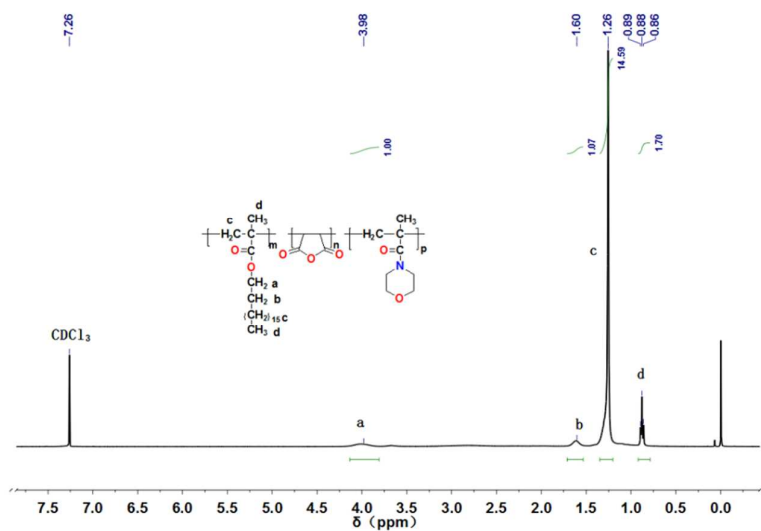

**Figure S9.** <sup>1</sup>H NMR spectrum (400 MHz) of **C18MC-MA-MCNR<sub>2</sub>** recorded in CDCl<sub>3</sub> at 298 K

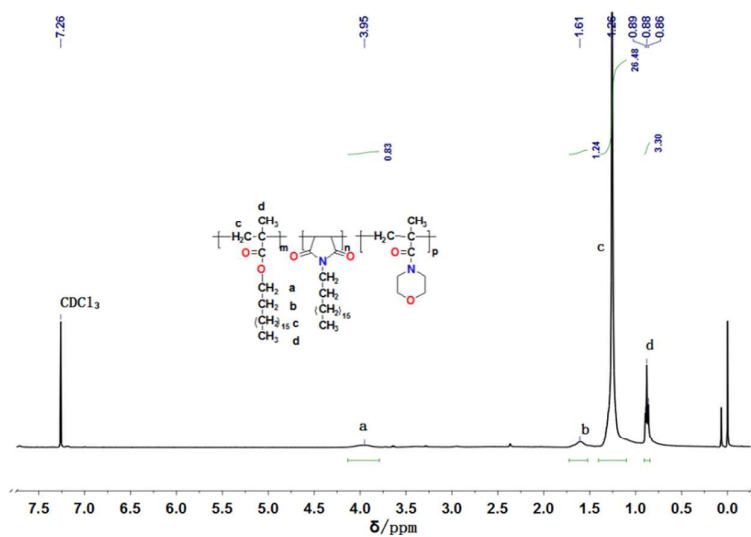

**Figure S10.** <sup>1</sup>H NMR spectrum (400 MHz) of **C18MC-MA-MCNR<sub>2</sub>-A** recorded in CDCl<sub>3</sub> at 298

## 2. FTIR SPECTRA OF COMPOUNDS AND TERPOLYMERS

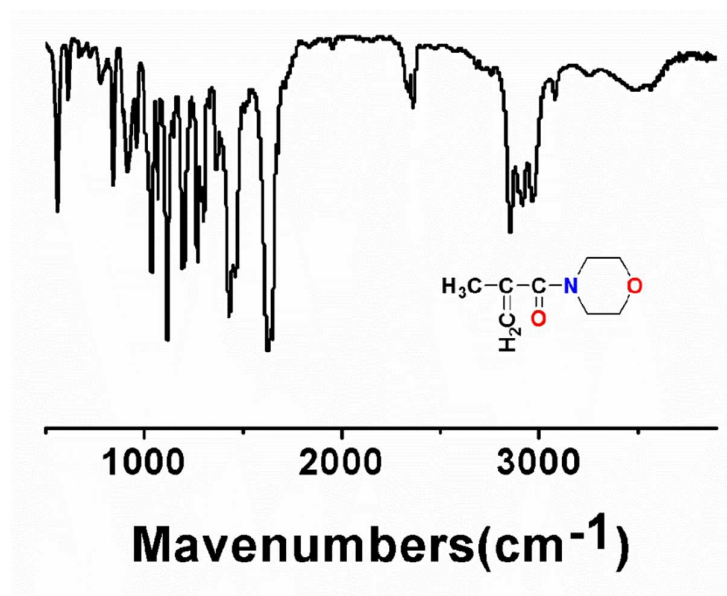

Figure S11. The IR spectra of methyl acrylamide morpholine

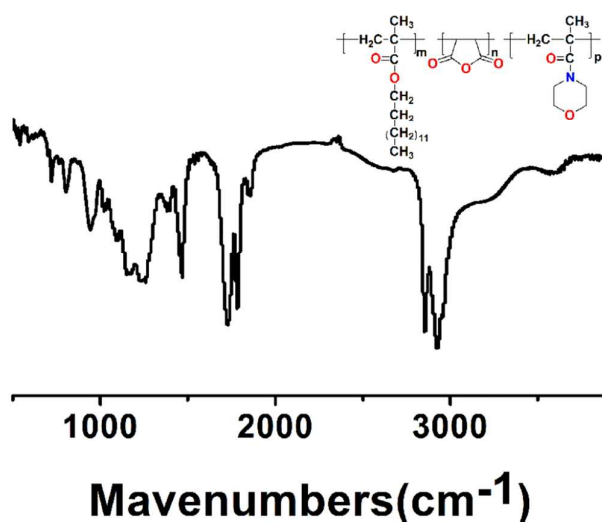

Figure S12. The IR spectra of C14MC-MA-MCNR<sub>2</sub>

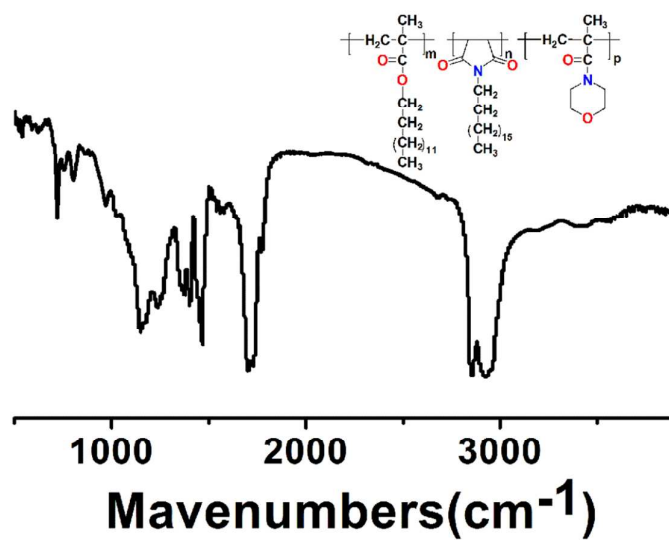

Figure S13. The IR spectra of C14MC- MA -MCNR<sub>2</sub>-a

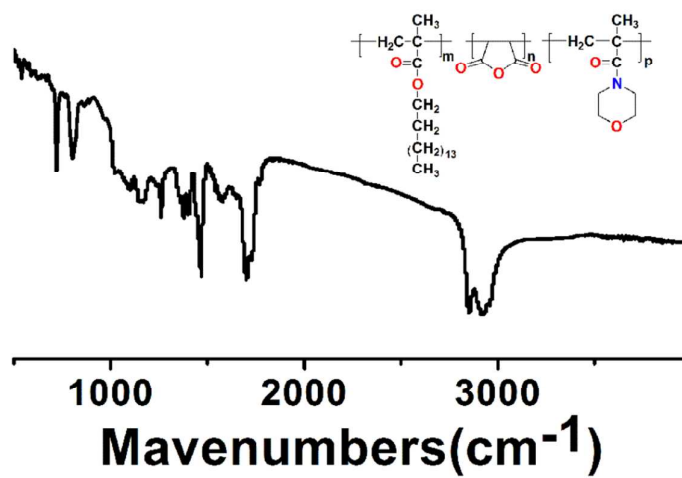

Figure S14. The IR spectra of C16MC- MA -MCNR<sub>2</sub>



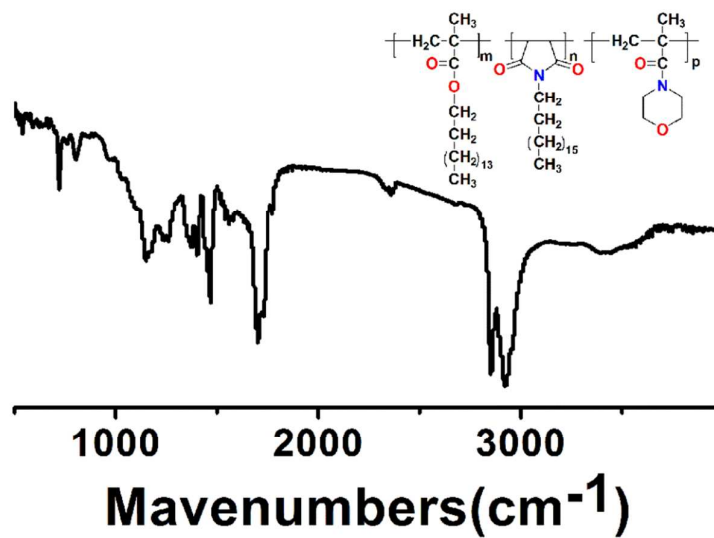

Figure S15. The IR spectra of C16MC- MA -MCNR<sub>2</sub>-a

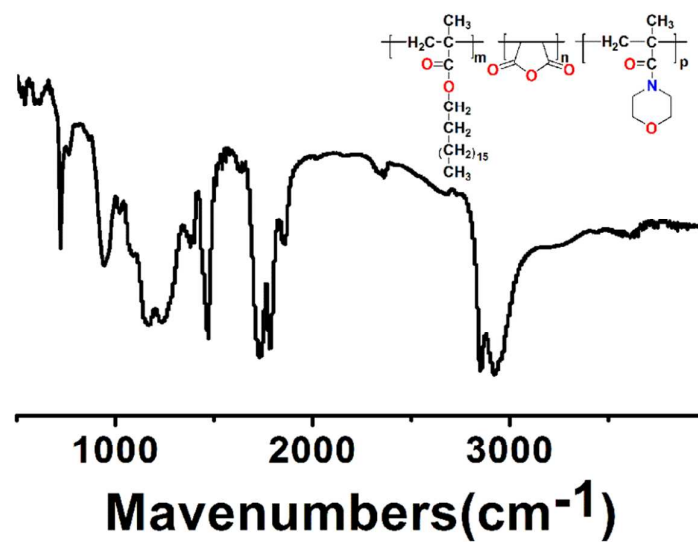

Figure S16. The IR spectra of C18MC- MA -MCNR<sub>2</sub>

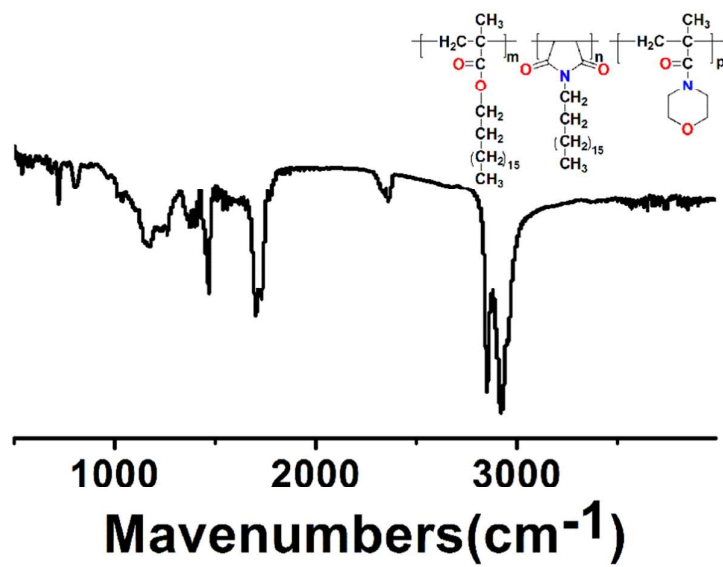

Figure S17. The IR spectra of C18MC- MA -MCNR<sub>2</sub>-a
